# Supplementary material
Source: PubMed Central journal article supplement (PMC1817638)
Supplement: 7601593s3.pdf [file 7601593s3.pdf]

Figure S3: Growth curves of mutant *N. meningitidis* strains

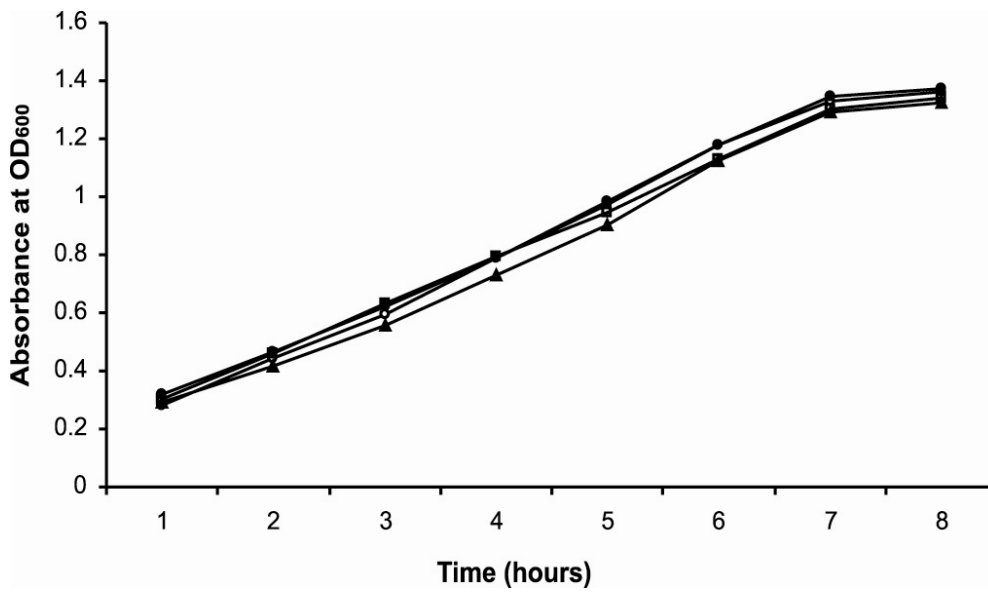

Growth curves were performed for MC58 (○),  $\Delta$ *nexo* (●),  $\Delta$ *nape* (▲) and  $\Delta$ *nexo* $\Delta$ *nape* strains (□). There was no difference in growth between strains as determined by measurement of optical density of cultures. Experiments were repeated three times, and a representative data set is shown.
