# Supplementary material
Source: PubMed Central journal article supplement (PMC1817638)
Supplement: 7601593s5.pdf [file 7601593s5.pdf]

**Table S2. Organisms with proposed homologues of both NExo and NApe.**

The residue equivalent to His<sup>167</sup> in NExo in sequence alignments is shown for both enzymes, with the percentage identity to the more closely related enzyme.

| Organism                              | NExo<br>paralogue | % amino<br>acid identity<br>with NExo | His <sup>167</sup><br>equiv. | NApe<br>paralogue | % amino<br>acid identity<br>with NApe | His <sup>167</sup><br>equiv. |
|---------------------------------------|-------------------|---------------------------------------|------------------------------|-------------------|---------------------------------------|------------------------------|
| <b>Actinobacteria</b>                 |                   |                                       |                              |                   |                                       |                              |
| Corynebacterium<br>diphtheriae        | Q6NF54            | 35.9                                  | H                            | Q6NIY3            | 36.8                                  | G                            |
| <i>Corynebacterium<br/>efficiens</i>  | Q8FMC8            | 36.6                                  | H                            | Q8FRS0            | 35.7                                  | G                            |
| <i>Corynebacterium<br/>glutamicum</i> | Q8NM39            | 36.6                                  | H                            | Q6M7A1            | 35.6                                  | G                            |
| <i>Corynebacterium<br/>jeikeium</i>   | Q4JXP6            | 33.5                                  | H                            | Q4JT19            | 35.0                                  | G                            |
| <i>Leifsonia xyli</i><br>subsp. Xyli  | Q6ACA2            | 37.6                                  | H                            | Q6AGQ6            | 37.1                                  | G                            |
| <i>Nocardia</i>                       | Q5YNT6            | 39.9                                  | H                            | Q5Z1B5            | 45.4                                  | G                            |

---

*farcinica*

*Streptomyces* Q82LP4 38.5 H Q82H83 49.6 G  
*avermitilis*

*Streptomyces* O86610 37.8 H Q9RKB3 49.2 G  
*coelicolor*

*Thermobifida* Q47TC1 38.3 H Q47PP2 50.8 G  
*fusca* YX

### Betaproteobacteria

*Azoarcus* sp. Q5P7J4 53.3 H Q5P3W6 61.4 G  
EbN1

*Bordetella* Q7WJJ8 50.0 L Q7WEU8 57.1 G  
*bronchiseptica*

*Bordetella* Q7WAF5 50.0 L Q7W3H4 57.1 G  
*parapertussis*

*Bordetella* Q7VWT3 50.0 L Q7VSN5 57.1 G  
*pertussis*

*Burkholderia* Q62IW2 49.2 L Q62MR1 57.8 G

---

|                        |        |       |   |        |       |   |
|------------------------|--------|-------|---|--------|-------|---|
| <i>mallei</i>          |        |       |   |        |       |   |
| <i>Burkholderia</i>    | Q63SK5 | 49.2  | L | Q63YJ6 | 57.8  | G |
| <i>pseudomallei</i>    |        |       |   |        |       |   |
| <i>Chromobacteriu</i>  | Q7NZP5 | 54.0  | L | Q7NQ93 | 67.7  | G |
| <i>m violaceum</i>     |        |       |   |        |       |   |
| <i>Dechloromonas</i>   | Q479V4 | 48.6  | L | Q47JU9 | 62.0  | G |
| <i>aromatica</i> RCB   |        |       |   |        |       |   |
| <i>Neisseria</i>       | Q5F6J3 | 95.7  | H | Q5F5D5 | 98.8  | G |
| <i>gonorrhoeae</i>     |        |       |   |        |       |   |
| <i>N. meningitidis</i> | Q9JSY0 | 96.9  | H | Q9JR99 | 100.0 | G |
| Z2491                  |        |       |   |        |       |   |
| <i>N. meningitidis</i> | Q9K100 | 100.0 | H | Q7DD47 | 100.0 | G |
| MC58                   |        |       |   |        |       |   |
| <i>Nitrosomonas</i>    | Q820S9 | 51.0  | L | Q820I5 | 56.1  | G |
| <i>europaea</i>        |        |       |   |        |       |   |
| <i>Ralstonia</i>       | Q8XZ13 | 47.2  | L | Q8Y341 | 57.0  | G |
| <i>solanacearum</i>    |        |       |   |        |       |   |

---

---

### Gammaproteobacteria

|                                                 |        |      |   |        |      |   |
|-------------------------------------------------|--------|------|---|--------|------|---|
| <i>L.pneumophila</i>                            | Q5WYQ1 | 46.9 | L | Q5WYQ2 | 50.0 | G |
| str. Lens                                       |        |      |   |        |      |   |
| <i>L.pneumophila</i>                            | Q5X7A2 | 46.9 | L | Q5X7A3 | 50.0 | G |
| str. Paris                                      |        |      |   |        |      |   |
| <i>L. pneumophila.</i>                          | Q5ZXT2 | 48.0 | L | Q5ZXT3 | 49.2 | G |
| Philadelphia 1                                  |        |      |   |        |      |   |
| <i>Methylococcus</i>                            | Q602J3 | 53.1 | L | Q60BZ2 | 54.7 | G |
| <i>capsulatus</i>                               |        |      |   |        |      |   |
| <i>Pseudomonas</i>                              | Q9HWK9 | 42.4 | L | Q51380 | 37.3 | G |
| <i>aeruginosa</i>                               |        |      |   |        |      |   |
| <i>Pseudomonas</i>                              | Q88JE2 | 40.1 | L | Q88C91 | 35.3 | G |
| <i>putida</i> KT2440                            |        |      |   |        |      |   |
| <i>Xanthomonas</i>                              | Q8P3M5 | 52.0 | L | Q8P470 | 48.9 | G |
| <i>campestris</i> pv.<br><i>campestris</i>      |        |      |   |        |      |   |
| <i>Xanthomonas</i>                              | Q4UP49 | 52.0 | L | Q4UPQ4 | 48.9 | G |
| <i>campestris</i> pv.<br><i>campestris</i> str. |        |      |   |        |      |   |

---

---

8004

|                           |        |      |   |        |      |   |
|---------------------------|--------|------|---|--------|------|---|
| <i>Xanthomonas</i>        | Q8PF17 | 51.6 | L | Q8PFS6 | 48.5 | G |
| <i>axonopodis</i> pv.     |        |      |   |        |      |   |
| <i>citri</i>              |        |      |   |        |      |   |
| <i>Xylella</i>            | Q9PC52 | 49.2 | L | Q9PGY2 | 47.0 | G |
| <i>fastidiosa</i>         |        |      |   |        |      |   |
| <i>Xylella fastidiosa</i> | Q87D22 | 49.2 | L | Q87F10 | 46.6 | G |
| Temecula1                 |        |      |   |        |      |   |
| <i>Xanthomonas</i>        | Q5GU19 | 49.6 | L | Q5H5K7 | 47.7 | G |
| <i>oryzae</i> pv.         |        |      |   |        |      |   |
| <i>oryzae</i>             |        |      |   |        |      |   |

---
