# Supplementary material
Source: PubMed Central journal article supplement (PMC1817638)
Supplement: 7601593s6.pdf [file 7601593s6.pdf]

**Table S3: oligonucleotide primers**

| <b>Primer</b> | <b>Sequence</b>                            |
|---------------|--------------------------------------------|
| NMB0399A      | 5' -CGGGATCCATGAAAATCACC ACTTGG-3'         |
| NMB0399B      | 5' -CCCAAGCTTTTACCAATCGAATTCTGC-3'         |
| NMB2082A      | 5' -CGGGATCCATGCTTAAAATCATTTC CGCC-3'      |
| NMB2082B      | 5' -CCCAAGCTTTTCGGCAGCATAGTCATAC-3'        |
| D146Nf        | 5' -CTGGTGTGCTGGGCAATTTC AATATCGCGCCTG-3'  |
| D146Nr        | 5' -CAGGCGCGATATTGAAATTGCC CAGCAACACCAG-3' |
| H167Sf        | 5' -GGCACGAAAAAATCAGCTGTTC GTCCGTCGAAC-3'  |
| H167Sr        | 5' -GTTCGACGGACGAACAGCTG ATTTTTTCGTGCC-3'  |
| H167Gf        | 5' -GGCACGAAAAAATCGGCTGTTC GTCCGTCGAAC-3'  |
| H167Gr        | 5' -GTTCGACGGACGAACAGCCG ATTTTTTCGTGCC-3'  |
| NG489         | 5' -CCG TCT GAA AGC CCG CCT TTA-3'         |
| NG490         | 5' -GCC TTG CCG TAC TAT TTG TAC-3'         |
| NG491         | 5' -GAGTTAACGACGTTGGCGGAAATGATTT-3'        |
| NG492         | 5' -GAAAGCTTTGGCTGCACAACGGCTTTAT-3         |
| NG493         | 5' -GAGATATCATCCACATCTGATCCTCTCCG-3'       |
| NG494         | 5' -GAGTTAACAAACATCGCCCACCAA AACAT-3'      |
